# Supplementary material for: High expression of SMARCA4 or SMARCA2 is frequently associated with an opposite prognosis in cancer
Source: PubMed Central journal article supplement (PMC5794756; doi:10.1038/s41598-018-20217-3), 2018-02-01
Supplement: 41598_2018_20217_MOESM1_ESM.pdf [file 41598_2018_20217_MOESM1_ESM.pdf]

**High expression of *SMARCA4* or *SMARCA2* is frequently associated  
with an opposite prognosis in cancer**

Jose A. Guerrero-Martínez and Jose C. Reyes

**Supplementary Figures and Tables.**

**Supplementary Table S1**  
**Supplementary Table S2**  
**Supplementary Figure S1**  
**Supplementary Figure S2**  
**Supplementary Figure S3**  
**Supplementary Figure S4**  
**Supplementary Figure S5**  
**Supplementary Figure S6**

Table S1. Datasets with significant changes of *SMARCA4* expression in tumors versus normal tissue. Data obtained from ONCOMINE.

| Type of Tumor                                      | Fold change <sup>a</sup> | P value  | N normal | N tumor | Data Link                      |
|----------------------------------------------------|--------------------------|----------|----------|---------|--------------------------------|
| Pleural Malignant Mesothelioma                     | 4.091                    | 5.73E-6  | 4        | 40      | <a href="#">GSE2549</a>        |
| Cutaneous Melanoma                                 | 4.051                    | 2.93E-7  | 7        | 45      | <a href="#">GSE3189</a>        |
| Smoldering Myeloma                                 | 4.035                    | 1.30E-6  | 22       | 12      | <a href="#">GSE5900</a>        |
| Monoclonal Gammopathy of Undetermined Significance | 2.269                    | 5.86E-10 | 22       | 44      | <a href="#">GSE5900</a>        |
| B-Cell Acute Lymphoblastic Leukemia                | 3.183                    | 2.29E-66 | 74       | 174     | <a href="#">GSE13159</a>       |
| Pro-B Acute Lymphoblastic Leukemia                 | 2.465                    | 2.60E-33 | 74       | 70      | <a href="#">GSE13159</a>       |
| T-Cell Acute Lymphoblastic Leukemia                | 2.460                    | 1.00E-53 | 74       | 174     | <a href="#">GSE13159</a>       |
| B-Cell Childhood Acute Lymphoblastic Leukemia      | 2.385                    | 1.02E-63 | 74       | 359     | <a href="#">GSE13159</a>       |
| Superficial Bladder Cancer                         | 3.172                    | 1.56E-16 | 48       | 28      | PMID: <a href="#">16432078</a> |
| Infiltrating Bladder Urothelial Carcinoma          | 2.320                    | 8.35E-13 | 48       | 81      | PMID: <a href="#">16432078</a> |
| Hepatocellular Carcinoma                           | 3.038                    | 2.43E-9  | 10       | 35      | <a href="#">GSE6764</a>        |
| Primary Effusion Lymphoma                          | 2.815                    | 1.07E-6  | 5        | 9       | <a href="#">GSE2350</a>        |
| Colorectal Carcinoma                               | 2.688                    | 3.66E-13 | 12       | 70      | <a href="#">GSE9348</a>        |
| Hepatocellular Carcinoma                           | 2.663                    | 4.09E-9  | 21       | 22      | <a href="#">GSE14520</a>       |
| Anaplastic Large Cell Lymphoma                     | 2.621                    | 5.23E-12 | 10       | 6       | <a href="#">GSE6338</a>        |
| Myxofibrosarcoma                                   | 2.515                    | 6.70E-10 | 9        | 31      | <a href="#">GSE21122</a>       |
| Pleomorphic Liposarcoma                            | 2.385                    | 1.16E-7  | 9        | 23      | <a href="#">GSE21122</a>       |
| Leiomyosarcoma                                     | 2.045                    | 1.86E-7  | 9        | 26      | <a href="#">GSE21122</a>       |
| Myxoid/Round Cell Liposarcoma                      | 2.040                    | 1.37E-7  | 9        | 20      | <a href="#">GSE21122</a>       |
| Infiltrating Bladder Urothelial Carcinoma          | 2.375                    | 1.71E-7  | 9        | 13      | <a href="#">GSE3167</a>        |
| Rectal Adenoma                                     | 2.156                    | 1.03E-5  | 7        | 7       | <a href="#">GSE8671</a>        |
| Hepatocellular Carcinoma                           | 2.149                    | 6.01E-56 | 220      | 225     | <a href="#">GSE14520</a>       |
| Colon Mucinous Adenocarcinoma                      | 2.116                    | 3.88E-6  | 5        | 13      | <a href="#">GSE5206</a>        |
| Astrocytoma                                        | 2.088                    | 6.22E-5  | 7        | 5       | PMID: <a href="#">12894235</a> |
| Glioblastoma                                       | 2.011                    | 3.79E-5  | 7        | 27      | PMID: <a href="#">12894235</a> |
| Plasma Cell Leukemia                               | 2.074                    | 8.72E-5  | 5        | 9       | <a href="#">GSE13591</a>       |
| Invasive Breast Carcinoma Stroma                   | -20.023                  | 9.71E-27 | 6        | 53      | <a href="#">GSE9014</a>        |
| Chronic Lymphocytic Leukemia                       | -2.717                   | 3.12E-8  | 5        | 34      | <a href="#">GSE2350</a>        |
| Teratoma, NOS                                      | -2.715                   | 2.03E-10 | 6        | 14      | <a href="#">GSE3218</a>        |
| Glioblastoma                                       | -2.373                   | 1.59E-7  | 3        | 22      | <a href="#">GSE4536</a>        |
| Smoldering Myeloma                                 | -2.158                   | 3.29E-6  | 22       | 12      | <a href="#">GSE5900</a>        |
| Esophageal Adenocarcinoma                          | -2.012                   | 7.57E-12 | 28       | 75      | <a href="#">GSE13898</a>       |

<sup>a</sup> Linear Fold-Change tumor versus normal tissue. Positive values indicate increase of expression, negative values indicate decrease of expression.

Table S2. Datasets with significant changes of *SMARCA2* expression in tumors versus normal tissue. Data obtained from ONCOMINE.

| Type of Tumor                 | Fold change <sup>a</sup> | P value  | N normal | N tumor | Data Link                      |
|-------------------------------|--------------------------|----------|----------|---------|--------------------------------|
| Benign Melanocytic Skin Nevus | 4.137                    | 9.56E-8  | 7        | 18      | <a href="#">GSE3189</a>        |
| Smoldering Myeloma            | 3.386                    | 4.39E-9  | 22       | 12      | <a href="#">GSE5900</a>        |
| Chronic Lymphocytic Leukemia  | 2.336                    | 3.68E-5  | 6        | 3       | PMID: <a href="#">12075054</a> |
| Invasive Breast Carcinoma     | 2.256                    | 5.83E-12 | 6        | 53      | <a href="#">GSE9014</a>        |
| Yolk Sac Tumor, NOS           | -12.346                  | 2.48E-11 | 6        | 9       | <a href="#">GSE3218</a>        |
| Mixed Germ Cell Tumor, NOS    | -4.278                   | 2.41E-11 | 6        | 41      | <a href="#">GSE3218</a>        |
| Embryonal Carcinoma, NOS      | -4.189                   | 9.73E-9  | 6        | 15      | <a href="#">GSE3218</a>        |
| Ovarian Serous Adenocarcinoma | -4.573                   | 3.50E-11 | 10       | 43      | <a href="#">GSE12470</a>       |
| Classic Medulloblastoma       | -4.370                   | 3.18E-6  | 4        | 46      | PMID: <a href="#">11807556</a> |
| Ovarian Carcinoma             | -4.364                   | 8.08E-8  | 10       | 185     | <a href="#">GSE26712</a>       |
| Hepatocellular Carcinoma      | -2.715                   | 3.01E-8  | 21       | 22      | <a href="#">GSE14520</a>       |
| Lung Adenocarcinoma           | -2.507                   | 3.12E-15 | 10       | 86      | PMID: <a href="#">12118244</a> |
| Hepatocellular Carcinoma      | -2.216                   | 1.41E-6  | 10       | 35      | <a href="#">GSE6764</a>        |
| Ductal Breast Carcinoma       | -2.207                   | 5.98E-11 | 7        | 40      | <a href="#">GSE3744</a>        |
| Glioblastoma                  | -2.107                   | 1.62E-12 | 4        | 27      | <a href="#">GSE2223</a>        |
| Ovarian Serous Adenocarcinoma | -2.063                   | 6.67E-6  | 4        | 41      | <a href="#">GSE6008</a>        |

<sup>a</sup> Linear Fold-Change tumor versus normal tissue. Positive values indicate increase of expression, negative values indicate decrease of expression.

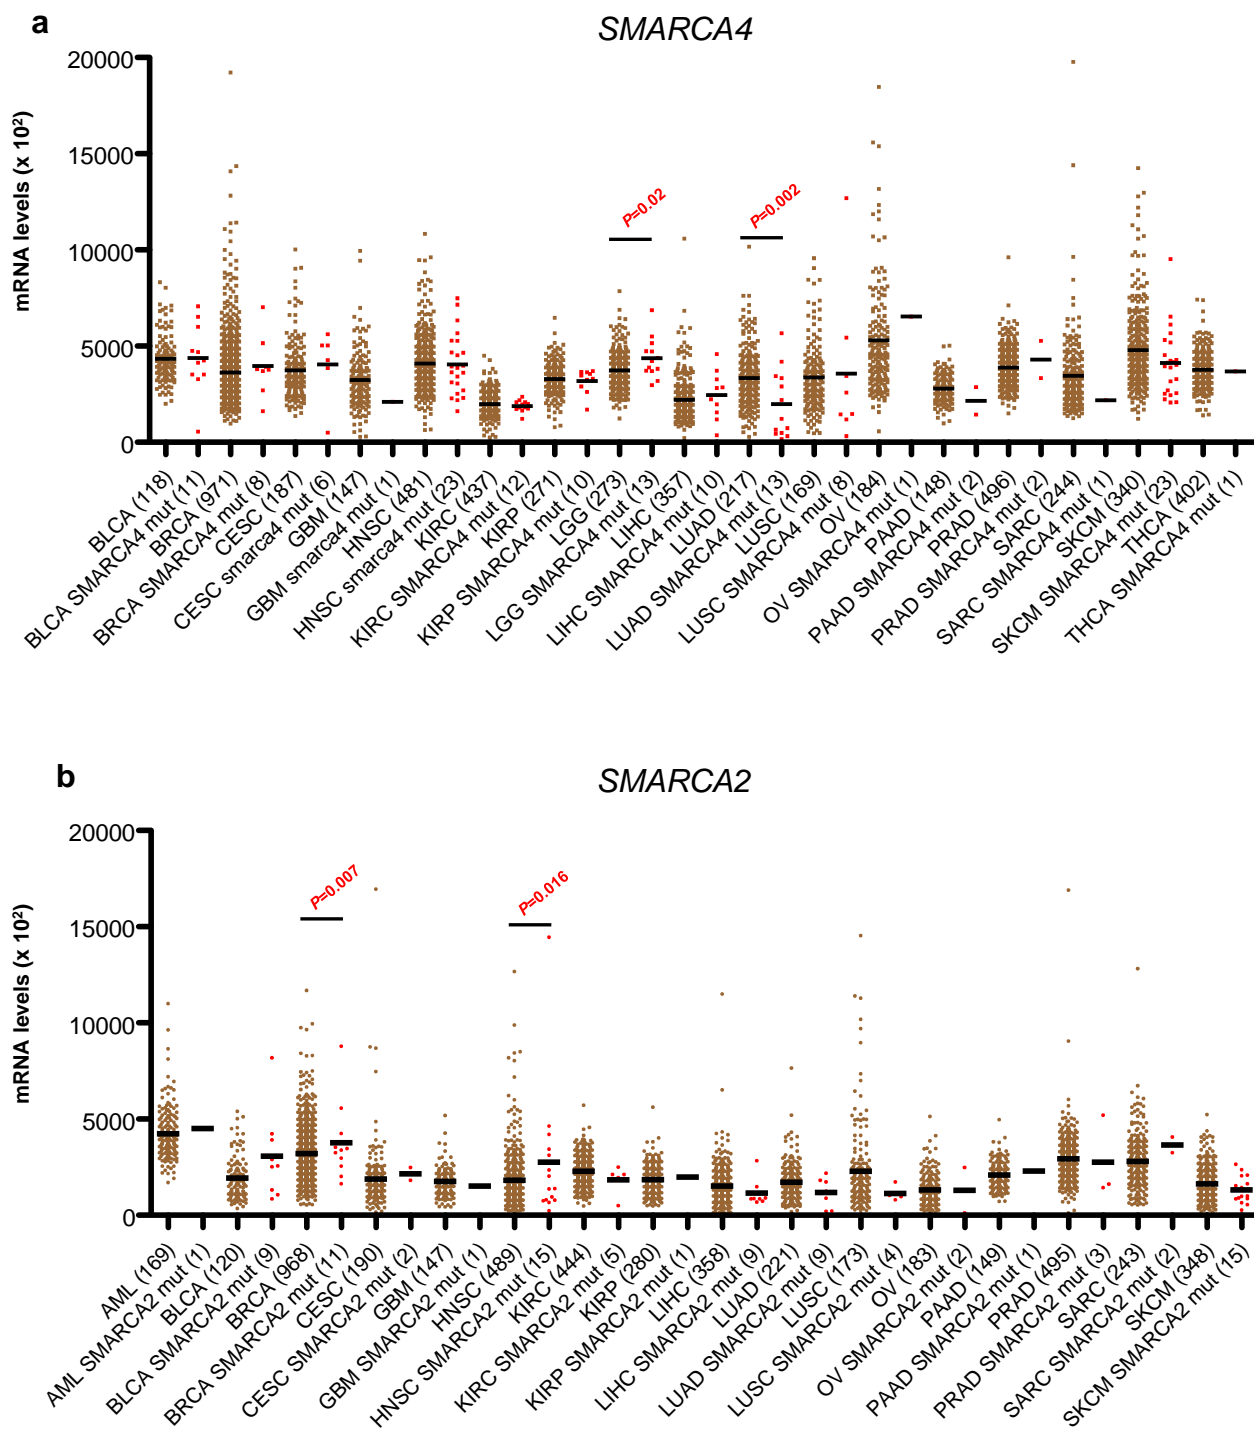

**Figure S1. Levels of *SMARCA4* and *SMARCA2* expression in multiple types of tumors. a, b** Effects of gene mutation on the levels of *SMARCA4* (a) or *SMARCA2* (b) mRNA (RNA-seq data) in samples of difference tumor types (data obtained from TCGA). Data from tumors with mutated *SMARCA4* or *SMARCA2* are depicted in red. Data from cohorts in which none of the tumors presented mutations in the *SMARCA4* or *SMARCA2* gene were not included in the graph. Number of tumors of each set is provided (note that the number of tumors does not always match the data given in Additional file 2: Table S3 due to the absence of sequencing data). Student's t-test  $P$  value ( $P \leq 0.05$ ) are provided.



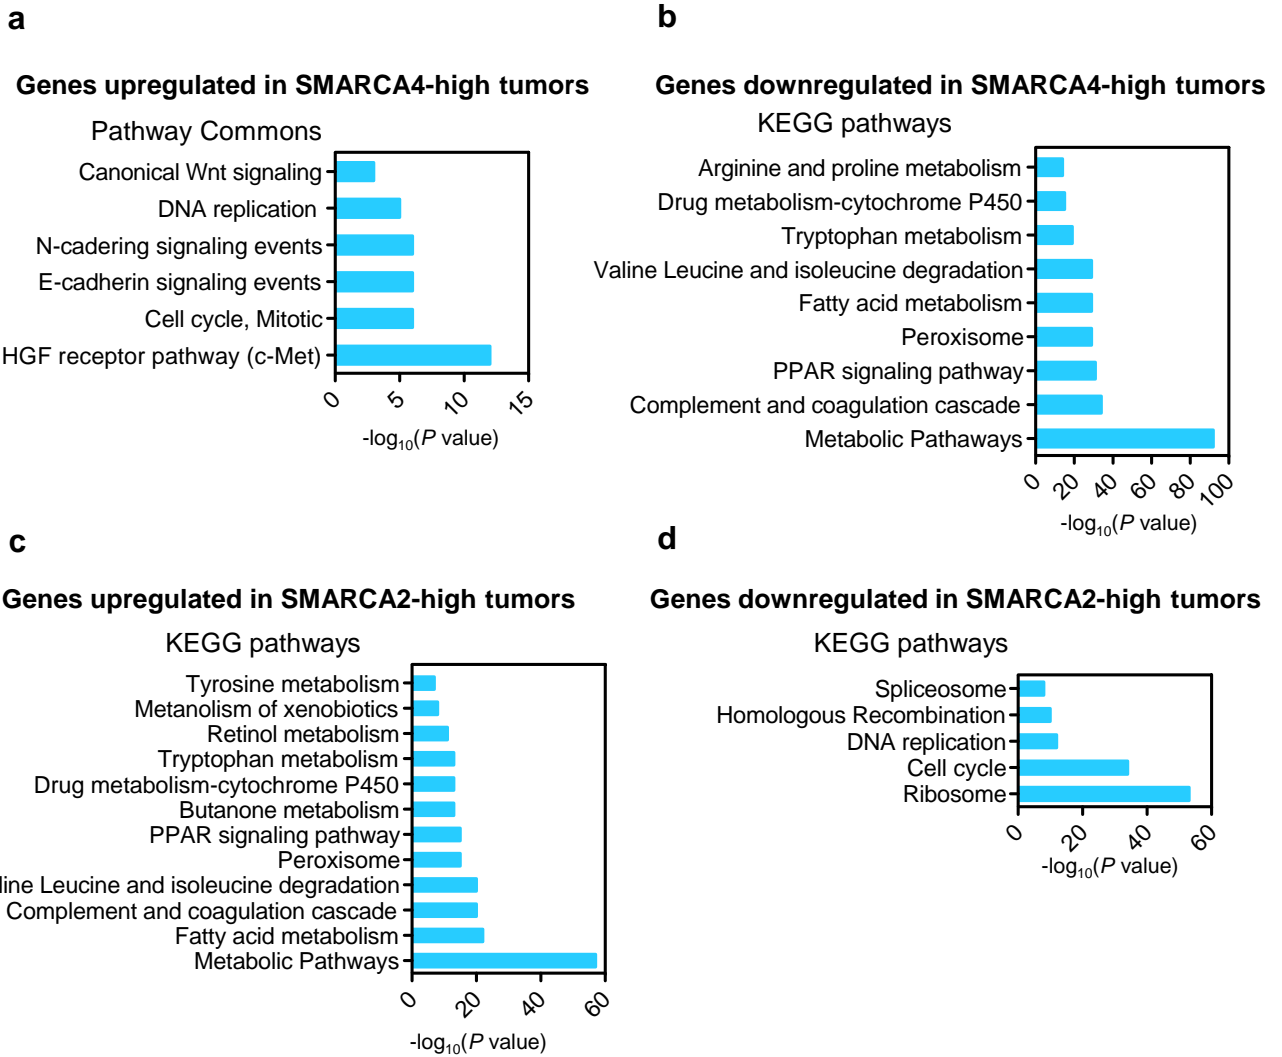

**Figure S3. Pathway enrichment data.** Genes differentially expressed in LIHC SMARCA4-high and SMARCA2-high tumors were analyzed for pathway enrichment using WebGestalt software packages. KEGG database pathways are provided, except for SMARCA4-high, for which the KEGG pathway enrichments were not significant and the Pathway Commons database was screened instead. Bonferroni-adjusted  $P$  values of the hypergeometric test were used to determine enrichment significance.

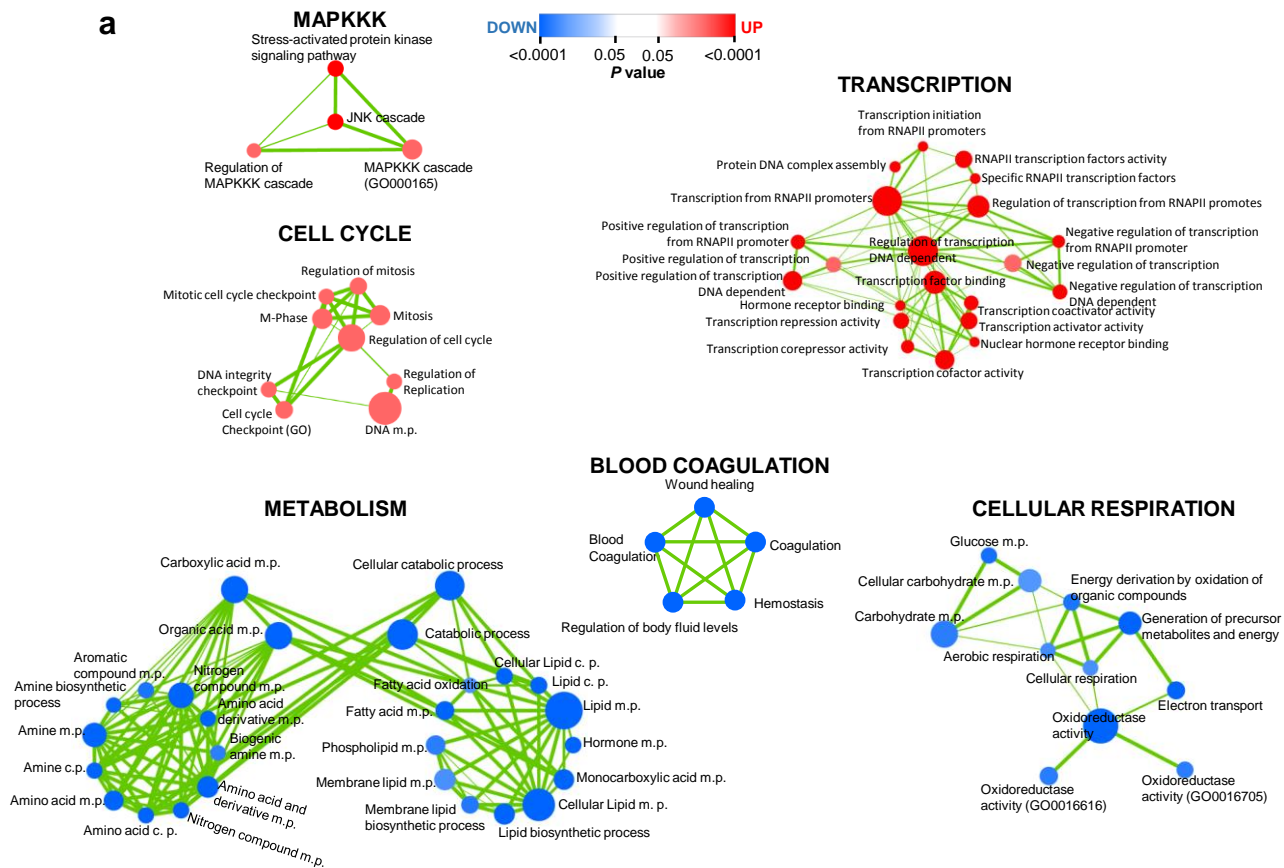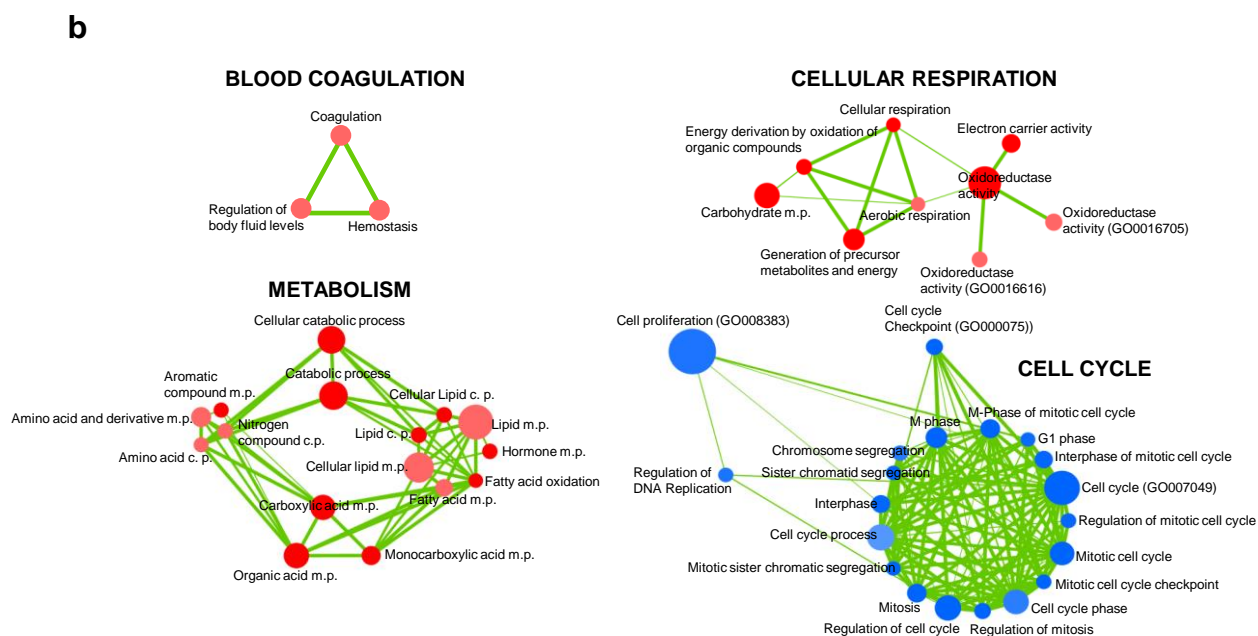

**Figure S4. GSEA enrichment maps of genes differentially expressed in LIHC SMARCA4-high (a) and SMARCA2-high (b) tumors.** a, b Geneset enrichment analysis was performed using GSEA v2.0.14 software with 1000 phenotype permutations. Nodes corresponded to enriched MSigDB gene sets. Node size is proportional to the number of matched genes in the geneset. Upregulated functions (nodes) are depicted in red, and downregulated functions, in blue. Node color intensity is proportional to the GSEA *P* value, and edge thickness, to the number of overlapping genes between categories. m.p. metabolic process; c.p. catabolic process

Figure S4

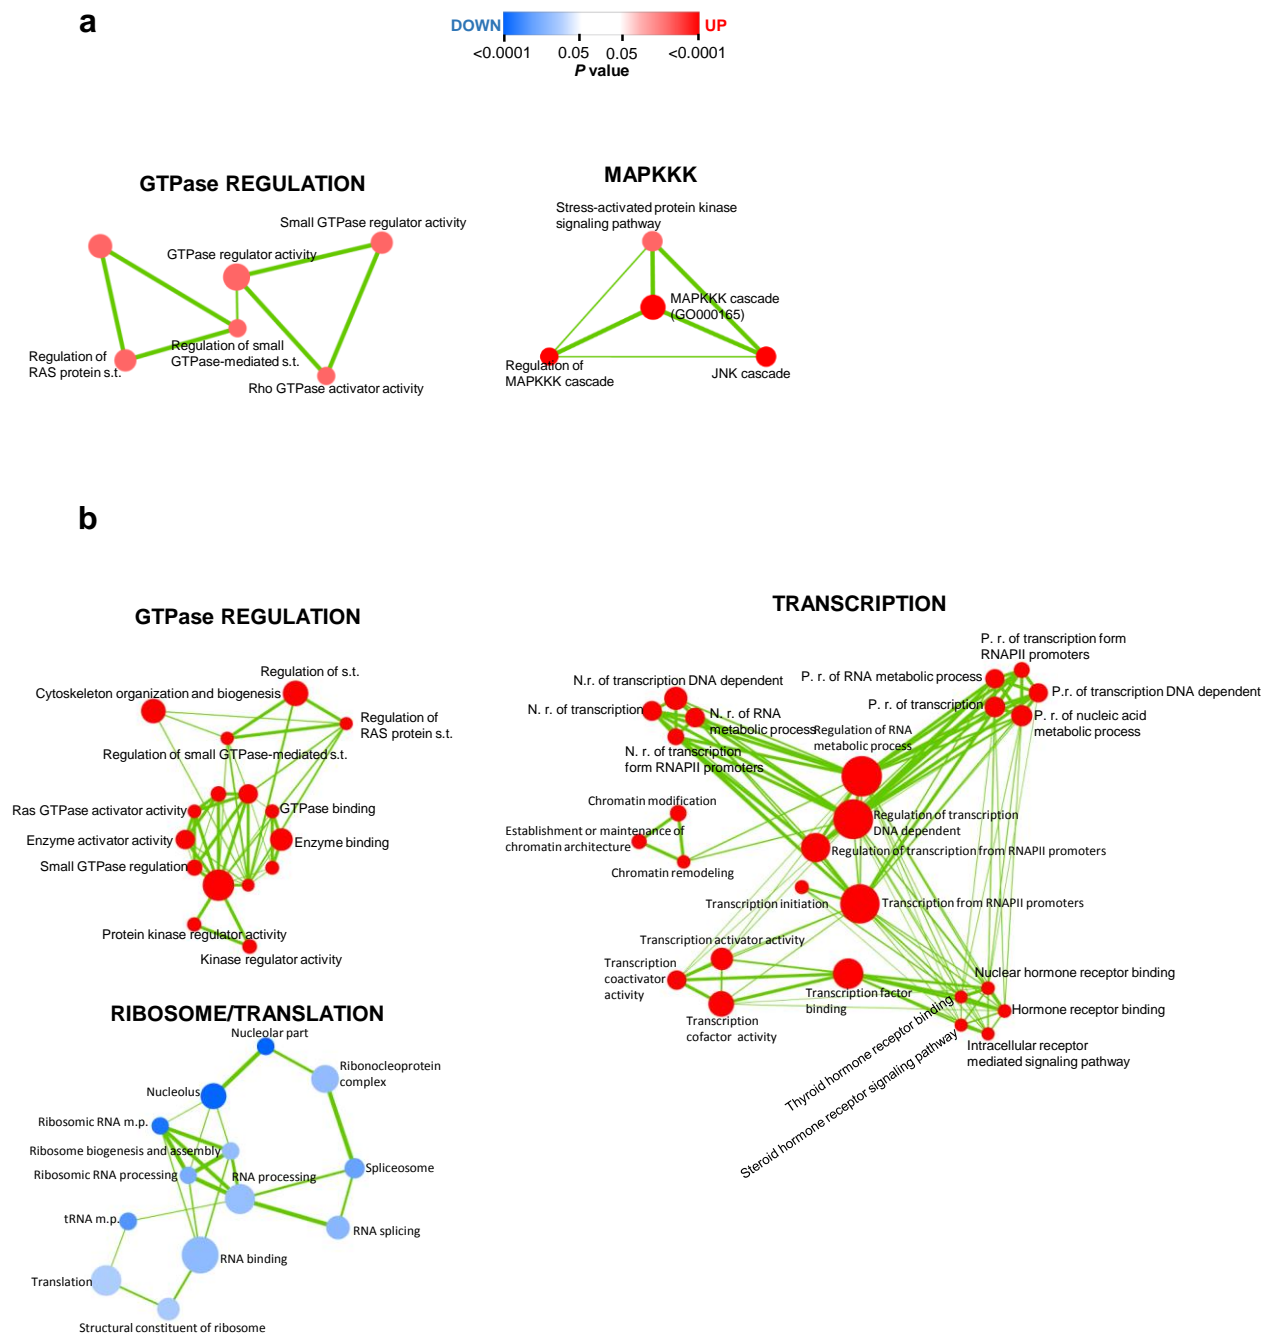

**Figure S5. GSEA enrichment maps of genes differentially expressed in KIRC SMARCA4-high (a) and SMARCA2-high (b) tumors.** See Additional file 3: Figure S4 legend for details. m.p. metabolic process; s.t. signal transduction; N.r. negative regulation; P.r. Positive regulation.



**a****Genes upregulated in SMARCA2-high tumors**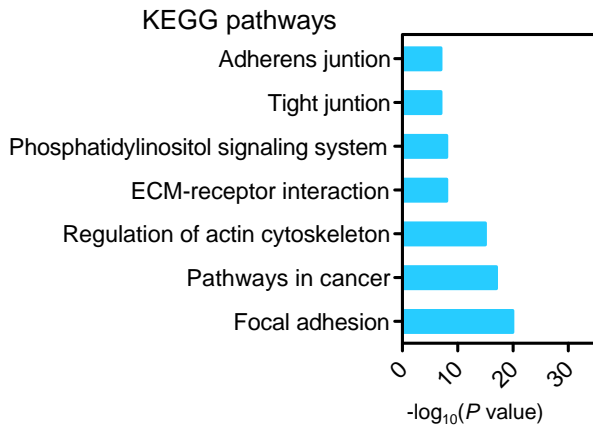**b****Genes downregulated in SMARCA2-high tumors**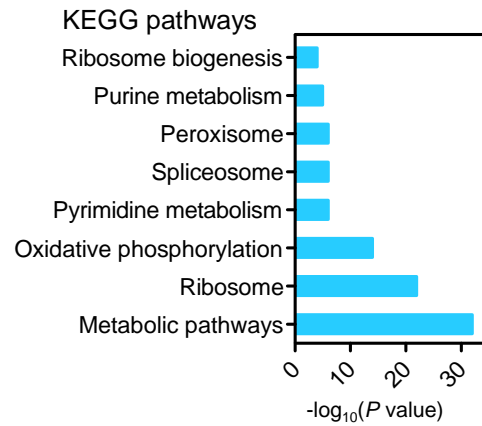

**Figure S6. Pathway enrichment data.** Genes differentially expressed in KIRC SMARCA4-high and SMARCA2-high tumors were analyzed for pathway enrichment using WebGestalt software packages. Bonferroni-adjusted  $P$  values of the hypergeometric test were used to determine enrichment significance.
